# Supplementary material
Source: publisher site journal article supplement (https://www.dovepress.com/article/506139)
Supplement: Supplementary file 1 [file 506139-Figure-S1.pdf › 506139-Figure-S1.pdf]

## Supplementary Figure 1

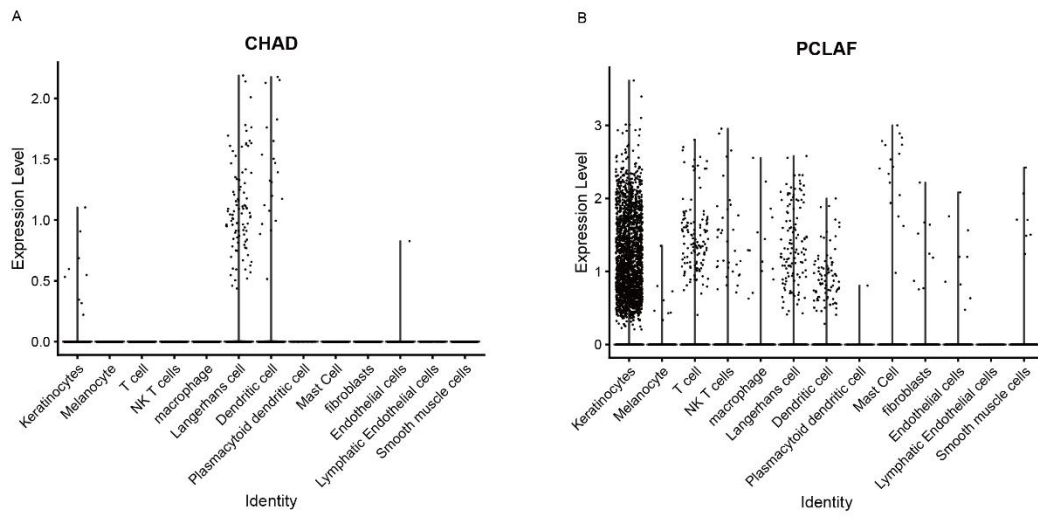

**Figure S1.** Differential expression of critical genes among distinct cell subpopulations. Expression levels of the CHAD gene (A) and PCLAF gene (B) in various cell types.
